# Supplementary material
Source: MDPI journal article supplement (https://www.mdpi.com/2073-445X/12/7/1353)
Supplement: s1 [file s1]

**Supplemental Table S1.** Spearman's rank correlation coefficients of relationships between the cumulative N<sub>2</sub>O, CH<sub>4</sub>, and CO<sub>2</sub> eq emissions and soil properties (means  $\pm$ SE;  $n = 4$ ).

| Variable           | N      | P      | K      | S     | MBC   | MBN   | EC    | pH <sup>†</sup> | TC     | TN     | Temp   | Moisture |
|--------------------|--------|--------|--------|-------|-------|-------|-------|-----------------|--------|--------|--------|----------|
| N <sub>2</sub> O   | -0.216 | 0.192  | -0.017 | 0.194 | 0.104 | 0.184 | 0.269 | -0.119          | 0.361* | 0.440* | 0.03   | 0.154    |
| CH <sub>4</sub>    | 0.140  | -0.192 | 0.049  | 0.251 | 0.214 | 0.344 | 0.258 | -0.26           | 0.405* | 0.367* | -0.026 | 0.030    |
| CO <sub>2</sub> eq | -0.321 | 0.208  | 0.038  | 0.087 | 0.083 | 0.124 | 0.097 | -0.082          | 0.362* | 0.381* | 0.008  | 0.043    |

**Note:** Abbreviations: EC, electroconductivity; K, potassium; N, (organic) nitrogen; P, Phosphorus; MBC, microbial biomass carbon; MBN, microbial biomass nitrogen; TC, total carbon; TN, total nitrogen; OM, organic matter.

<sup>†</sup>Soil pH was measured in an 1:5 soil:water (v:v) ratio. Means followed by a common letter within a column are not significantly different ( $p < 0.05$ ). Significance: \*,  $p < 0.05$ .
